# Supplementary material
Source: Springer Nature journal article supplement (https://www.springermedizin.de/resource/supplementary/13256_2009_1151_MOESM1_ESM.pdf/9647116)
Supplement: MOESM1 [file 9647116]



haemorrhage

This is a coronal CT scan of the abdomen. The liver is the large, homogenous organ in the upper right quadrant. A large, well-defined, hypodense (darker) area is visible in the upper part of the liver, indicated by a red arrow. The spleen is located in the upper left quadrant. A smaller, hypodense lesion is visible in the spleen, also indicated by a red arrow. The rest of the abdominal cavity shows various organs and structures, including the stomach, intestines, and kidneys.

metastasis
